# Supplementary material for: Detection of HIV-1 and Human Proteins in Urinary Extracellular Vesicles from HIV+ Patients
Source: Adv Virol. 2018 Mar 12;2018:7863412. doi: 10.1155/2018/7863412 (PMC5867598; doi:10.1155/2018/7863412)
Supplement: Supplementary 2 — EV HIV protein interactions (Nef, Vif, Vpr, and Vpu) with human proteins identified using HIV-1 Human Interaction database (https://www.ncbi.nlm.nih.gov/genome/viruses/retroviruses/hiv-1/interactions/). The file includes the gene symbol, human protein name, interaction keywords, protein accession ID, and PMID of references citing the interaction. [file 7863412.f2.xlsx]

## Sheet: Sheet1
Accession	# AAs	MW [kDa]	calc. pI	Description	ΣCoverage	Σ# Peptides	Score A0	Coverage A0	# Peptides A0
gi5730547	166	18.7786	8.95361	envelope glycoprotein [Human immunodeficiency virus 1]	10.24	2
gi89277784	851	96.2701	8.47021	envelope glycoprotein [Human immunodeficiency virus 1]	2.47	2
gi7258504	343	37.9989	8.99756	exterior membrane protein gp120 [Human immunodeficiency virus 1]	13.41	2
gi33411733	132	14.7266	9.53955	gag [Human immunodeficiency virus 1]	18.18	2	1.79123	18.18	2
gi108860338	498	55.4781	9.15869	Gag [Human immunodeficiency virus 1]	4.02	2	1.73989	4.02	2
gi114431062	498	55.7302	9.0415	Gag [Human immunodeficiency virus 1]	5.42	2
gi54792352	213	23.677	5.63037	gag polyprotein [Human immunodeficiency virus 1]	9.39	2	2.34492	9.39	2
gi84618413	222	24.5954	5.63037	gag polyprotein [Human immunodeficiency virus 1]	9.01	3	2.3346	9.01	2
gi54792336	213	23.659	5.87158	gag polyprotein [Human immunodeficiency virus 1]	11.27	2	1.72421	11.27	2
gi210038298	152	17.1067	9.80322	gag polyprotein [Human immunodeficiency virus 1]	16.45	2
gi186940922	501	55.6922	9.1001	gag polyprotein [Human immunodeficiency virus 1]	4.99	2
gi469240	498	55.4631	8.76318	gag polyprotein [Human immunodeficiency virus 1]	7.83	2
gi40643580	71	7.69985	6.59521	gag polyprotein [Human immunodeficiency virus 1]	52.11	2
gi25166702	498	55.3911	8.99756	gag polyprotein precursor [Human immunodeficiency virus 1]	2.61	2	1.74329	2.61	2
gi45360139	488	54.4537	8.98291	gag protein [Human immunodeficiency virus 1]	2.25	2	4.55188	2.25	2
gi74229538	148	16.6256	9.46631	gag protein [Human immunodeficiency virus 1]	10.14	2	4.36777	10.14	2
gi73913149	141	15.7367	9.45166	gag protein [Human immunodeficiency virus 1]	14.89	2	4.24109	14.89	2
gi255989692	85	9.6065	8.32373	gag protein [Human immunodeficiency virus 1]	41.18	3	4.15502	17.65	2
gi18463347	133	14.6987	9.1001	gag protein [Human immunodeficiency virus 1]	15.04	2	4.02866	15.04	2
gi73913183	132	15.3046	9.5835	gag protein [Human immunodeficiency virus 1]	20.45	3	3.67394	20.45	3
gi190193489	141	15.9013	9.37842	gag protein [Human immunodeficiency virus 1]	7.8	2	3.66488	7.8	2
gi189173616	137	15.5018	9.80322	gag protein [Human immunodeficiency virus 1]	14.6	6	3.65141	14.6	5
gi164606200	492	54.9431	9.23193	gag protein [Human immunodeficiency virus 1]	2.44	2	3.48475	2.44	2
gi227057911	497	0	8.74854	gag protein [Human immunodeficiency virus 1]	7.65	2	3.4394	7.65	2
gi1899096	490	54.8979	9.12939	gag protein [Human immunodeficiency virus 1]	5.71	3	2.67277	5.71	3
gi259127463	499	55.408	9.1001	gag protein [Human immunodeficiency virus 1]	5.21	2	2.57857	5.21	2
gi80974858	130	14.5724	9.34912	gag protein [Human immunodeficiency virus 1]	21.54	3	2.48497	21.54	3
gi119361904	304	33.807	8.92432	gag protein [Human immunodeficiency virus 1]	6.91	2	2.40609	6.91	2
gi197295950	147	16.4486	9.45166	gag protein [Human immunodeficiency virus 1]	13.61	2	2.38944	13.61	2
gi12746202	104	11.9231	8.85107	gag protein [Human immunodeficiency virus 1]	18.27	3	2.35952	18.27	2
gi255986590	501	55.496	9.15869	gag protein [Human immunodeficiency virus 1]	4.99	2	2.26942	4.99	1
gi206129752	401	44.4881	8.73389	gag protein [Human immunodeficiency virus 1]	7.48	2	2.18279	7.48	2
gi22596348	494	55.2622	9.1001	gag protein [Human immunodeficiency virus 1]	3.64	2	2.12154	3.64	1
gi242027851	453	50.8478	8.89502	gag protein [Human immunodeficiency virus 1]	5.52	3	2.02491	5.52	1
gi189173858	136	15.2937	9.84717	gag protein [Human immunodeficiency virus 1]	19.12	2	2.02154	19.12	2
gi255986546	500	0	9.08545	gag protein [Human immunodeficiency virus 1]	5.8	3	2.01531	4.6	1
gi166026570	500	0	8.38232	gag protein [Human immunodeficiency virus 1]	6	3	2.00664	6	3
gi73913207	88	10.2181	10.0962	gag protein [Human immunodeficiency virus 1]	12.5	2	1.93081	12.5	2
gi189173806	137	15.3807	9.84717	gag protein [Human immunodeficiency virus 1]	15.33	2	1.86795	15.33	2
gi74229586	155	17.3031	9.53955	gag protein [Human immunodeficiency virus 1]	7.1	2	1.86601	7.1	2
gi119361857	493	55.058	9.08545	gag protein [Human immunodeficiency virus 1]	6.29	2	1.82323	6.29	2
gi73913089	104	11.7119	10.1401	gag protein [Human immunodeficiency virus 1]	22.12	4	1.82259	22.12	2
gi213138337	490	54.8029	9.11475	gag protein [Human immunodeficiency virus 1]	3.88	2	1.80747	3.88	2
gi226345150	133	15.0504	9.5249	gag protein [Human immunodeficiency virus 1]	7.52	2	1.79918	7.52	2
gi263201003	494	54.8648	9.1001	gag protein [Human immunodeficiency virus 1]	4.05	3	1.77873	4.05	3
gi189173434	52	5.87905	11.0776	gag protein [Human immunodeficiency virus 1]	38.46	2	1.75177	19.23	1
gi189173592	144	15.8929	9.84717	gag protein [Human immunodeficiency virus 1]	7.64	2	1.72448	7.64	2
gi58700459	502	55.7034	9.23193	gag protein [Human immunodeficiency virus 1]	3.39	2	1.7106	3.39	1
gi118139405	168	18.8055	7.38623	gag protein [Human immunodeficiency virus 1]	9.52	2	1.69344	9.52	2
gi255739509	494	55.1877	8.96826	gag protein [Human immunodeficiency virus 1]	4.66	3	1.64766	3.85	2
gi227976901	72	8.09896	5.33838	gag protein [Human immunodeficiency virus 1]	38.89	2	1.62712	23.61	1
gi78127431	142	15.6479	9.53955	gag protein [Human immunodeficiency virus 1]	11.97	3	1.61251	11.97	3
gi259128826	496	55.4253	9.24658	gag protein [Human immunodeficiency virus 1]	8.47	2	0	4.03	1
gi259127184	499	55.2927	9.08545	gag protein [Human immunodeficiency virus 1]	5.21	2	0	5.21	2
gi255986724	498	55.486	9.1001	gag protein [Human immunodeficiency virus 1]	2.81	2	0	2.81	2
gi255986588	503	56.1223	8.96826	gag protein [Human immunodeficiency virus 1]	5.57	2	0	5.57	2
gi255986372	347	38.096	6.21436	gag protein [Human immunodeficiency virus 1]	9.51	2	0	9.51	2
gi255986346	506	56.4917	9.0415	gag protein [Human immunodeficiency virus 1]	4.74	2	0	4.74	2
gi255986237	499	55.6234	8.86572	gag protein [Human immunodeficiency virus 1]	7.41	2	0	7.41	2
gi255985861	502	56.0573	9.17334	gag protein [Human immunodeficiency virus 1]	5.98	4	0	5.58	2
gi255739585	493	55.1231	9.0415	gag protein [Human immunodeficiency virus 1]	12.78	3	0	8.72	2
gi255739099	487	0	9.1001	gag protein [Human immunodeficiency virus 1]	3.29	2	0	3.29	2
gi261414259	213	23.3888	5.56689	gag protein [Human immunodeficiency virus 1]	27.23	2	0	27.23	2
gi227057926	494	55.3529	8.93896	gag protein [Human immunodeficiency virus 1]	3.85	2	0	3.85	2
gi227976885	73	8.34103	6.02393	gag protein [Human immunodeficiency virus 1]	15.07	5	0	15.07	2
gi87131115	498	55.5471	9.02686	gag protein [Human immunodeficiency virus 1]	10.64	3	0	5.22	2
gi33328320	496	55.2161	9.17334	gag protein [Human immunodeficiency virus 1]	3.63	2	0	3.63	2
gi32812024	491	54.6579	9.0415	gag protein [Human immunodeficiency virus 1]	9.78	2	0	4.28	1
gi30908606	137	15.2647	9.39307	gag protein [Human immunodeficiency virus 1]	18.25	4	0	18.25	2
gi29119685	508	56.2574	8.88037	gag protein [Human immunodeficiency virus 1]	4.53	2	0	4.53	2
gi14573147	130	14.4604	9.62744	gag protein [Human immunodeficiency virus 1]	16.15	2	0	16.15	2
gi14573123	133	14.7995	9.46631	gag protein [Human immunodeficiency virus 1]	19.55	2	0	16.54	1
gi57901108	503	55.9374	8.93896	gag protein [Human immunodeficiency virus 1]	4.97	2	0	4.97	2
gi57901079	503	55.9614	8.93896	gag protein [Human immunodeficiency virus 1]	4.57	3	0	4.57	3
gi56266823	500	55.0491	9.15869	gag protein [Human immunodeficiency virus 1]	5.4	3	0	5.4	3
gi56112207	140	15.4857	9.30518	gag protein [Human immunodeficiency virus 1]	18.57	2	0	18.57	2
gi53690142	291	32.5624	9.15869	gag protein [Human immunodeficiency virus 1]	9.28	2	0	9.28	2
gi7767289	100	11.1386	5.13525	gag protein [Human immunodeficiency virus 1]	20	2	0	20	1
gi3252937	491	54.9631	9.02686	gag protein [Human immunodeficiency virus 1]	4.68	2	0	4.68	2
gi3002877	500	55.9264	9.08545	gag protein [Human immunodeficiency virus 1]	4	2	0	1.6	1
gi238733922	500	56.0867	9.31982	gag protein [Human immunodeficiency virus 1]	8.8	2	0	8.8	2
gi238733888	498	55.6342	8.63135	gag protein [Human immunodeficiency virus 1]	5.02	2	0	5.02	2
gi194716784	500	55.5841	9.1001	gag protein [Human immunodeficiency virus 1]	5.2	2	0	5.2	2
gi213138182	499	55.7284	9.12939	gag protein [Human immunodeficiency virus 1]	5.01	2	0	5.01	2
gi213138055	492	55.1551	9.1001	gag protein [Human immunodeficiency virus 1]	6.91	2	0	5.49	1
gi213137583	478	53.2943	9.02686	gag protein [Human immunodeficiency virus 1]	10.04	3	0	10.04	2
gi206129871	398	0	9.15869	gag protein [Human immunodeficiency virus 1]	8.79	3	0	8.79	3
gi206129716	398	0	9.01221	gag protein [Human immunodeficiency virus 1]	6.78	2	0	6.28	1
gi206129608	509	56.5445	9.24658	gag protein [Human immunodeficiency virus 1]	4.91	2	0	4.91	1
gi170778646	500	55.8213	8.95361	gag protein [Human immunodeficiency virus 1]	5.2	3	0	4.6	1
gi166026424	500	55.8786	8.95361	gag protein [Human immunodeficiency virus 1]	5.2	2	0	5.2	2
gi166026046	507	56.5284	8.95361	gag protein [Human immunodeficiency virus 1]	5.13	3	0	5.13	2
gi166025820	504	55.984	8.86572	gag protein [Human immunodeficiency virus 1]	5.16	2	0	5.16	2
gi166025658	500	55.7901	9.0415	gag protein [Human immunodeficiency virus 1]	5.6	2	0	5.6	2
gi62997597	494	54.7168	9.15869	gag protein [Human immunodeficiency virus 1]	5.47	2	0	5.47	1
gi124299467	469	52.4113	8.51416	gag protein [Human immunodeficiency virus 1]	4.48	2	0	4.48	2
gi134255008	497	55.3619	8.95361	gag protein [Human immunodeficiency virus 1]	5.03	2	0	4.23	1
gi37935910	498	55.4942	8.98291	gag protein [Human immunodeficiency virus 1]	3.21	2	0	3.21	1
gi118426880	75	8.30277	9.92041	gag protein [Human immunodeficiency virus 1]	54.67	2	0	33.33	1
gi9368379	497	55.153	9.08545	GAG protein [Human immunodeficiency virus 1]	4.43	3	0	4.43	2
gi73913163	95	10.8701	9.51025	gag protein [Human immunodeficiency virus 1]	40	2	0	23.16	1
gi229661921	500	55.5973	9.0415	gag protein [Human immunodeficiency virus 1]	3.8	2
gi259129239	497	55.2051	9.1001	gag protein [Human immunodeficiency virus 1]	6.84	2
gi259128364	497	55.2983	9.0415	gag protein [Human immunodeficiency virus 1]	10.46	2
gi259127971	495	55.1551	9.27588	gag protein [Human immunodeficiency virus 1]	4.04	2
gi259127944	495	55.1239	9.18799	gag protein [Human immunodeficiency virus 1]	5.66	2
gi259126799	497	55.4282	9.1001	gag protein [Human immunodeficiency virus 1]	4.02	2
gi255986776	500	55.8464	9.0708	gag protein [Human immunodeficiency virus 1]	8.6	3
gi255986636	501	0	8.79248	gag protein [Human immunodeficiency virus 1]	4.59	2
gi255986600	367	40.9793	8.80713	gag protein [Human immunodeficiency virus 1]	12.53	2
gi255986494	501	55.8364	8.68994	gag protein [Human immunodeficiency virus 1]	4.79	3
gi255986175	498	55.2929	8.76318	gag protein [Human immunodeficiency virus 1]	4.42	2
gi255986161	501	55.7831	8.92432	gag protein [Human immunodeficiency virus 1]	5.19	2
gi255986103	497	55.4942	9.14404	gag protein [Human immunodeficiency virus 1]	4.63	2
gi255739433	491	54.8878	8.93896	gag protein [Human immunodeficiency virus 1]	4.07	4
gi255739325	498	55.6913	9.02686	gag protein [Human immunodeficiency virus 1]	8.43	3
gi255739301	492	55.1361	9.11475	gag protein [Human immunodeficiency virus 1]	4.07	2
gi255739289	493	0	8.88037	gag protein [Human immunodeficiency virus 1]	6.69	2
gi255739253	492	55.0103	8.88037	gag protein [Human immunodeficiency virus 1]	8.94	3
gi227057908	498	55.6129	9.12939	gag protein [Human immunodeficiency virus 1]	9.44	2
gi227057790	493	54.927	8.93896	gag protein [Human immunodeficiency virus 1]	9.13	4
gi227057784	492	54.8001	9.11475	gag protein [Human immunodeficiency virus 1]	7.52	2
gi269316020	154	17.2791	9.99365	gag protein [Human immunodeficiency virus 1]	26.62	2
gi57546992	138	15.544	9.46631	gag protein [Human immunodeficiency virus 1]	25.36	2
gi112351448	498	55.5491	9.1001	gag protein [Human immunodeficiency virus 1]	10.24	2
gi61655027	136	15.2747	9.61279	gag protein [Human immunodeficiency virus 1]	13.97	2
gi33088460	157	17.3395	9.36377	gag protein [Human immunodeficiency virus 1]	29.3	5
gi32811922	396	43.8843	8.80713	gag protein [Human immunodeficiency virus 1]	6.31	3
gi30908584	141	15.65	9.61279	gag protein [Human immunodeficiency virus 1]	19.15	2
gi27948613	131	14.7075	9.49561	gag protein [Human immunodeficiency virus 1]	16.03	2
gi22596222	498	55.1431	9.01221	gag protein [Human immunodeficiency virus 1]	4.82	2
gi14573179	133	14.7326	9.43701	gag protein [Human immunodeficiency virus 1]	19.55	2
gi12239529	133	14.7432	9.34912	gag protein [Human immunodeficiency virus 1]	18.8	2
gi57901069	502	55.9733	9.01221	gag protein [Human immunodeficiency virus 1]	5.18	2
gi57868055	210	23.8601	9.78857	gag protein [Human immunodeficiency virus 1]	11.43	2
gi56266795	495	55.112	9.29053	gag protein [Human immunodeficiency virus 1]	5.45	2
gi55560686	500	55.8004	9.18799	gag protein [Human immunodeficiency virus 1]	2.8	3
gi50660225	365	40.8693	8.83643	gag protein [Human immunodeficiency virus 1]	7.67	2
gi46946970	339	37.5278	8.68994	gag protein [Human immunodeficiency virus 1]	7.08	2
gi37682999	493	55.2222	9.23193	gag protein [Human immunodeficiency virus 1]	10.95	2
gi37682432	496	55.0722	9.23193	gag protein [Human immunodeficiency virus 1]	9.27	2
gi6857090	68	7.49575	10.5063	gag protein [Human immunodeficiency virus 1]	30.88	2
gi6815605	265	29.3697	8.88037	gag protein [Human immunodeficiency virus 1]	9.43	2
gi6019097	133	14.7596	9.43701	gag protein [Human immunodeficiency virus 1]	16.54	2
gi4098019	206	23.4709	9.62744	gag protein [Human immunodeficiency virus 1]	11.17	2
gi3193281	495	55.1919	8.85107	gag protein [Human immunodeficiency virus 1]	5.66	2
gi2895258	130	14.7476	9.81787	gag protein [Human immunodeficiency virus 1]	13.08	2
gi242030878	459	51.0391	9.05615	gag protein [Human immunodeficiency virus 1]	4.79	2
gi242030301	460	51.3741	8.93896	gag protein [Human immunodeficiency virus 1]	5.22	2
gi242029012	453	50.7947	8.89502	gag protein [Human immunodeficiency virus 1]	9.49	2
gi197296048	147	16.387	8.00146	gag protein [Human immunodeficiency virus 1]	18.37	2
gi206570697	497	55.2721	9.23193	gag protein [Human immunodeficiency virus 1]	8.45	5
gi222431462	176	19.7546	9.89111	gag protein [Human immunodeficiency virus 1]	11.93	2
gi212278173	499	55.9623	8.95361	gag protein [Human immunodeficiency virus 1]	4.61	2
gi223951325	507	56.3046	9.01221	gag protein [Human immunodeficiency virus 1]	7.89	2
gi226345254	131	14.5553	9.62744	gag protein [Human immunodeficiency virus 1]	31.3	2
gi226345185	137	15.1835	9.42236	gag protein [Human immunodeficiency virus 1]	35.77	2
gi209961190	359	39.7111	7.07861	gag protein [Human immunodeficiency virus 1]	5.29	5
gi222428498	500	55.7623	9.02686	gag protein [Human immunodeficiency virus 1]	4.6	2
gi195954539	494	55.0838	9.05615	gag protein [Human immunodeficiency virus 1]	4.86	2
gi56608713	500	56.0777	9.17334	gag protein [Human immunodeficiency virus 1]	5.8	4
gi195957157	205	22.6244	6.29053	gag protein [Human immunodeficiency virus 1]	20	2
gi169883490	144	16.0712	9.65674	gag protein [Human immunodeficiency virus 1]	18.75	2
gi213138343	502	56.0305	9.11475	gag protein [Human immunodeficiency virus 1]	10.96	2
gi213138136	497	55.4422	9.05615	gag protein [Human immunodeficiency virus 1]	7.24	3
gi213137883	501	55.7184	9.02686	gag protein [Human immunodeficiency virus 1]	5.99	2
gi213137775	500	56.0385	8.98291	gag protein [Human immunodeficiency virus 1]	5	2
gi213137714	492	55.0691	9.05615	gag protein [Human immunodeficiency virus 1]	4.88	3
gi169159450	345	38.4665	7.15186	gag protein [Human immunodeficiency virus 1]	7.54	2
gi206129855	403	44.781	9.08545	gag protein [Human immunodeficiency virus 1]	6.45	3
gi206129727	396	44.2439	8.89502	gag protein [Human immunodeficiency virus 1]	6.82	2
gi206129695	508	56.3882	8.79248	gag protein [Human immunodeficiency virus 1]	5.91	2
gi206129656	492	54.8111	8.79248	gag protein [Human immunodeficiency virus 1]	3.66	2
gi206129593	496	55.1963	9.0708	gag protein [Human immunodeficiency virus 1]	6.25	2
gi206129536	496	55.1739	9.20264	gag protein [Human immunodeficiency virus 1]	5.44	2
gi206129518	494	54.8269	9.11475	gag protein [Human immunodeficiency virus 1]	9.72	2
gi206129501	492	55.0829	9.0708	gag protein [Human immunodeficiency virus 1]	3.66	2
gi192335044	505	56.3956	9.11475	gag protein [Human immunodeficiency virus 1]	4.55	2
gi164418638	486	54.4808	8.95361	gag protein [Human immunodeficiency virus 1]	4.32	2
gi189214158	245	27.3269	9.61279	gag protein [Human immunodeficiency virus 1]	15.1	5
gi166026390	500	55.765	8.88037	gag protein [Human immunodeficiency virus 1]	4.2	2
gi166026252	503	56.0699	8.80713	gag protein [Human immunodeficiency virus 1]	3.78	2
gi166026220	504	56.2592	8.86572	gag protein [Human immunodeficiency virus 1]	5.16	2
gi166026188	502	0	8.70459	gag protein [Human immunodeficiency virus 1]	5.38	2
gi166025852	500	55.8243	8.85107	gag protein [Human immunodeficiency virus 1]	4.2	2
gi166025840	506	56.8311	9.1001	gag protein [Human immunodeficiency virus 1]	4.15	2
gi164606252	493	55.3711	8.96826	gag protein [Human immunodeficiency virus 1]	4.46	2
gi147744214	191	21.0874	9.18799	gag protein [Human immunodeficiency virus 1]	13.61	3
gi158536527	502	55.6363	9.01221	gag protein [Human immunodeficiency virus 1]	4.38	3
gi157274012	500	55.7784	9.21729	gag protein [Human immunodeficiency virus 1]	4.2	2
gi37700776	115	12.6944	9.30518	gag protein [Human immunodeficiency virus 1]	18.26	2
gi37700754	106	11.7529	9.30518	gag protein [Human immunodeficiency virus 1]	18.87	2
gi133902453	484	54.2445	8.89502	gag protein [Human immunodeficiency virus 1]	3.93	2
gi86277189	141	15.8729	9.48096	gag protein [Human immunodeficiency virus 1]	19.86	3
gi80975372	133	14.8156	9.49561	gag protein [Human immunodeficiency virus 1]	15.04	2
gi71384263	120	13.4158	9.5542	gag protein [Human immunodeficiency virus 1]	15.83	2
gi73913215	148	16.7933	9.5835	gag protein [Human immunodeficiency virus 1]	20.27	2
gi18073541	139	15.4949	9.5249	gag protein [Human immunodeficiency virus 1]	12.95	2
gi4336330	497	55.3364	9.0708	gag protein [Human immunodeficiency virus 1]	8.45	2
gi283444909	492	55.156	9.12939	gag protein [Human immunodeficiency virus 1]	5.28	3
gi259127727	500	55.9303	9.1001	gag protein [Human immunodeficiency virus 1]	4.2	2
gi259127682	497	55.2992	9.27588	gag protein [Human immunodeficiency virus 1]	9.05	2
gi259125560	497	55.063	9.18799	gag protein [Human immunodeficiency virus 1]	8.05	2
gi255986788	503	0	8.95361	gag protein [Human immunodeficiency virus 1]	8.75	2
gi255986674	510	56.6268	9.1001	gag protein [Human immunodeficiency virus 1]	4.12	2
gi255986634	500	55.8613	9.08545	gag protein [Human immunodeficiency virus 1]	5	4
gi255986129	504	56.2796	8.99756	gag protein [Human immunodeficiency virus 1]	9.13	2
gi255739513	498	55.7513	8.98291	gag protein [Human immunodeficiency virus 1]	4.02	2
gi255739407	498	55.8404	8.80713	gag protein [Human immunodeficiency virus 1]	3.61	2
gi255739297	493	55.4452	8.86572	gag protein [Human immunodeficiency virus 1]	7.71	2
gi224796292	214	23.7388	9.24658	gag protein [Human immunodeficiency virus 1]	14.95	2
gi110750482	499	55.8844	9.0415	gag protein [Human immunodeficiency virus 1]	4.81	2
gi254667194	443	49.4626	8.04541	gag protein [Human immunodeficiency virus 1]	5.19	2
gi74229558	149	16.6777	9.5542	gag protein [Human immunodeficiency virus 1]	40.27	2
gi270266440	119	13.0936	9.01221	gag protein [Human immunodeficiency virus 1]	20.17	2
gi33328188	496	55.0079	8.95361	gag protein [Human immunodeficiency virus 1]	6.25	2
gi33145821	365	40.6388	8.35303	gag protein [Human immunodeficiency virus 1]	3.84	2
gi32812052	491	54.9882	9.49561	gag protein [Human immunodeficiency virus 1]	3.67	2
gi24061891	349	38.9627	9.02686	gag protein [Human immunodeficiency virus 1]	9.74	2
gi22596431	497	55.3331	9.18799	gag protein [Human immunodeficiency virus 1]	3.82	2
gi15011350	491	54.8579	9.27588	gag protein [Human immunodeficiency virus 1]	5.3	2
gi57901098	500	55.6054	9.01221	gag protein [Human immunodeficiency virus 1]	4.8	2
gi55979641	130	14.364	9.78857	gag protein [Human immunodeficiency virus 1]	18.46	2
gi55416381	486	54.1195	9.11475	gag protein [Human immunodeficiency virus 1]	5.14	2
gi47079009	139	16.2566	11.1362	gag protein [Human immunodeficiency virus 1]	10.79	2
gi6815714	172	19.3298	9.71533	gag protein [Human immunodeficiency virus 1]	13.95	2
gi5256913	110	12.7808	9.29053	gag protein [Human immunodeficiency virus 1]	10.91	2
gi242028613	451	50.4503	8.35303	gag protein [Human immunodeficiency virus 1]	6.21	2
gi219688663	497	55.4701	9.05615	gag protein [Human immunodeficiency virus 1]	2.62	2
gi212278169	500	55.9763	8.95361	gag protein [Human immunodeficiency virus 1]	4.2	3
gi226345476	132	14.8493	9.5249	gag protein [Human immunodeficiency virus 1]	29.55	3
gi226345430	131	14.9034	9.70068	gag protein [Human immunodeficiency virus 1]	17.56	2
gi226345412	139	15.6257	9.5249	gag protein [Human immunodeficiency virus 1]	16.55	2
gi225581235	505	56.0023	8.86572	gag protein [Human immunodeficiency virus 1]	4.16	2
gi194276543	283	31.3586	7.02002	gag protein [Human immunodeficiency virus 1]	6.71	2
gi213137920	492	55.2542	9.1001	gag protein [Human immunodeficiency virus 1]	4.47	2
gi206129859	389	43.3537	8.96826	gag protein [Human immunodeficiency virus 1]	6.68	2
gi206129818	401	44.8349	8.93896	gag protein [Human immunodeficiency virus 1]	6.23	3
gi189173749	138	15.5125	9.89111	gag protein [Human immunodeficiency virus 1]	7.25	2
gi189173714	141	15.9759	9.70068	gag protein [Human immunodeficiency virus 1]	14.89	2
gi189173685	137	15.4958	9.84717	gag protein [Human immunodeficiency virus 1]	18.25	2
gi189173495	137	15.4495	9.70068	gag protein [Human immunodeficiency virus 1]	17.52	2
gi166026458	500	0	9.02686	gag protein [Human immunodeficiency virus 1]	4.6	2
gi166026050	501	55.7821	8.6167	gag protein [Human immunodeficiency virus 1]	4.59	2
gi166025990	505	56.2744	9.02686	gag protein [Human immunodeficiency virus 1]	4.95	2
gi166025664	497	0	8.80713	gag protein [Human immunodeficiency virus 1]	5.03	2
gi166025484	497	55.4364	8.60205	gag protein [Human immunodeficiency virus 1]	5.03	2
gi183206894	239	26.6663	9.72998	gag protein [Human immunodeficiency virus 1]	11.72	2
gi157004986	502	55.9493	8.95361	gag protein [Human immunodeficiency virus 1]	3.59	2
gi151413500	500	55.7593	8.95361	gag protein [Human immunodeficiency virus 1]	4.6	2
gi124299192	466	52.0117	7.84033	gag protein [Human immunodeficiency virus 1]	4.94	2
gi37700888	115	12.8503	9.34912	gag protein [Human immunodeficiency virus 1]	17.39	2
gi133902554	500	55.7964	9.01221	gag protein [Human immunodeficiency virus 1]	4.6	2
gi119361860	505	56.5348	9.08545	gag protein [Human immunodeficiency virus 1]	4.95	4
gi38491832	499	55.5912	9.0415	gag protein [Human immunodeficiency virus 1]	3.61	2
gi80975274	130	14.6435	9.77393	gag protein [Human immunodeficiency virus 1]	16.92	2
gi77024815	125	13.9839	9.01221	gag protein [Human immunodeficiency virus 1]	19.2	2
gi88853343	495	55.0709	9.11475	gag protein [Human immunodeficiency virus 1]	3.84	2
gi73913245	133	14.6975	8.45557	gag protein [Human immunodeficiency virus 1]	29.32	2
gi259127544	495	55.216	9.23193	gag protein [Human immunodeficiency virus 1]	5.66	4
gi259125524	497	55.021	9.24658	gag protein [Human immunodeficiency virus 1]	4.83	2
gi227057882	490	54.2706	9.01221	gag protein [Human immunodeficiency virus 1]	2.65	2
gi254667022	490	54.5817	8.92432	gag protein [Human immunodeficiency virus 1]	4.69	2
gi33088384	158	17.4695	9.36377	gag protein [Human immunodeficiency virus 1]	11.39	2
gi55560961	497	55.367	9.08545	gag protein [Human immunodeficiency virus 1]	4.63	2
gi46946955	349	38.8145	8.54346	gag protein [Human immunodeficiency virus 1]	6.02	2
gi6815678	244	27.2997	9.24658	gag protein [Human immunodeficiency virus 1]	8.2	2
gi226345506	132	14.9023	9.81787	gag protein [Human immunodeficiency virus 1]	12.12	3
gi209961152	361	40.1462	7.73779	gag protein [Human immunodeficiency virus 1]	6.37	2
gi194276593	284	31.1097	6.56592	gag protein [Human immunodeficiency virus 1]	7.04	2
gi194276211	285	31.2655	6.13818	gag protein [Human immunodeficiency virus 1]	6.32	2
gi206129812	384	42.5165	8.35303	gag protein [Human immunodeficiency virus 1]	5.73	3
gi166025620	500	55.8888	8.96826	gag protein [Human immunodeficiency virus 1]	4.6	2
gi118721600	145	16.3595	8.98291	gag protein [Human immunodeficiency virus 1]	15.17	2
gi37934056	545	61.6423	8.98291	gag-pol fusion polyprotein [Human immunodeficiency virus 1]	9.17	2	2.06155	4.77	1
gi4107489	1435	162.018	8.73389	gag-pol fusion polyprotein [Human immunodeficiency virus 1]	4.67	4	1.91512	2.51	3
gi1732486	1425	160.771	8.70459	Gag-Pol fusion polyprotein [Human immunodeficiency virus 1]	1.12	2	1.85266	1.12	2
gi25166841	1431	161.436	8.71924	gag-pol fusion polyprotein [Human immunodeficiency virus 1]	1.05	3	0	1.05	1
gi37934044	574	65.0299	9.20264	gag-pol fusion polyprotein [Human immunodeficiency virus 1]	4.88	3	0	4.01	1
gi37934040	570	64.6302	8.85107	gag-pol fusion polyprotein [Human immunodeficiency virus 1]	4.74	2	0	4.39	1
gi2570321	1435	161.802	8.77783	Gag-Pol fusion polyprotein [Human immunodeficiency virus 1]	5.51	4	0	1.11	2
gi32261456	1430	161.439	8.63135	gag-pol fusion polyprotein precursor [Human immunodeficiency virus 1]	1.82	3	0	1.82	3
gi124483081	588	67.7143	7.97217	gag-pol fusion polyprotein precursor [Human immunodeficiency virus 1]	3.23	2
gi32261465	1425	161.015	8.67529	gag-pol fusion polyprotein precursor [Human immunodeficiency virus 1]	2.25	2
gi119710415	260	28.5267	9.37842	gag-pol fusion protein [Human immunodeficiency virus 1]	6.54	2
gi42628662	174	19.2171	8.27979	gag-pol polyprotein [Human immunodeficiency virus 1]	8.62	3	0	8.62	1
gi33088566	247	27.487	9.34912	gag-pol polyprotein [Human immunodeficiency virus 1]	6.88	2
gi33088540	247	26.9545	8.95361	gag-pol polyprotein [Human immunodeficiency virus 1]	7.69	2
gi33088514	247	27.1276	8.73389	gag-pol polyprotein [Human immunodeficiency virus 1]	13.77	2
gi4324847	1429	160.955	8.39697	gag-pol polyprotein [Human immunodeficiency virus 1]	1.26	4
gi4324808	1437	161.877	8.32373	gag-pol polyprotein [Human immunodeficiency virus 1]	2.99	3
gi4324774	1427	161.211	8.38232	gag-pol polyprotein [Human immunodeficiency virus 1]	1.61	2
gi33088548	248	27.1117	8.95361	gag-pol polyprotein [Human immunodeficiency virus 1]	8.87	2
gi554807	94	10.4031	7.73779	hypervariable regions V1 and V2; putative [Human immunodeficiency virus 1]	31.91	2
gi255686947	288	32.2025	7.75244	integrase [Human immunodeficiency virus 1]	4.51	2	1.60542	4.51	2
gi150380166	285	31.682	8.70459	integrase [Human immunodeficiency virus 1]	7.02	2	0	7.02	1
gi263201476	288	0	8.20654	integrase [Human immunodeficiency virus 1]	10.42	2
gi255687481	288	32.2534	7.75244	integrase [Human immunodeficiency virus 1]	5.56	2
gi6006947	95	10.4684	8.74854	integrase [Human immunodeficiency virus 1]	40	2
gi209572262	277	30.9959	8.47021	integrase [Human immunodeficiency virus 1]	4.69	2
gi263201534	288	32.2146	7.75244	integrase [Human immunodeficiency virus 1]	4.51	2
gi1458050	206	24.0491	7.53271	Nef [Human immunodeficiency virus 1]	20.87	3	0	20.87	2
gi2276296	210	23.8377	6.21436	nef [Human immunodeficiency virus 1]	10.95	3	0	10.95	2
gi722066	206	23.6746	6.34131	nef [Human immunodeficiency virus 1]	11.17	2
gi5730834	207	23.5406	5.96045	Nef [Human immunodeficiency virus 1]	8.7	2
gi257146474	206	23.3335	5.31299	nef protein [HIV-1 M_97CD.MBFE250]	12.62	2
gi263200973	209	23.6595	5.99854	nef protein [Human immunodeficiency virus 1]	6.7	2	3.55362	6.7	2
gi51950778	208	23.3884	5.84619	nef protein [Human immunodeficiency virus 1]	11.06	2	2.35682	11.06	2
gi56608840	209	23.8446	5.32568	nef protein [Human immunodeficiency virus 1]	9.57	2	2.16091	9.57	2
gi256012706	195	22.1828	5.56689	nef protein [Human immunodeficiency virus 1]	9.74	3	2.0604	5.13	1
gi37935887	212	23.8018	6.52197	nef protein [Human immunodeficiency virus 1]	8.96	2	1.89508	8.96	2
gi282598030	220	24.5011	6.16357	nef protein [Human immunodeficiency virus 1]	9.09	2	1.86965	9.09	2
gi256012470	167	18.7791	5.85889	nef protein [Human immunodeficiency virus 1]	9.58	2	1.85486	9.58	2
gi31087435	206	23.4698	6.43018	nef protein [Human immunodeficiency virus 1]	7.77	2	1.79376	7.77	1
gi3403222	209	23.8059	6.12549	nef protein [Human immunodeficiency virus 1]	11	2	1.73001	11	2
gi94538974	214	24.1715	5.33838	nef protein [Human immunodeficiency virus 1]	10.28	2	1.6609	10.28	2
gi57904556	208	23.8696	6.1001	nef protein [Human immunodeficiency virus 1]	5.77	2	1.64375	5.77	1
gi57904556	208	23.8696	6.1001	nef protein [Human immunodeficiency virus 1]	5.77	2	1.64375	5.77	1
gi94539754	210	23.9539	5.43994	nef protein [Human immunodeficiency virus 1]	14.76	2	1.61598	8.57	1
gi260514148	210	23.9439	6.354	nef protein [Human immunodeficiency virus 1]	12.38	2	0	12.38	2
gi256012540	191	21.8873	5.47803	nef protein [Human immunodeficiency virus 1]	9.42	2	0	9.42	2
gi256012240	206	23.5974	5.96045	nef protein [Human immunodeficiency virus 1]	7.77	2	0	7.77	2
gi256012170	198	22.6661	5.41455	nef protein [Human immunodeficiency virus 1]	10.61	2	0	10.61	2
gi256011840	204	23.1401	5.60498	nef protein [Human immunodeficiency virus 1]	6.86	2	0	6.86	2
gi4868275	206	23.4784	6.15088	nef protein [Human immunodeficiency virus 1]	8.74	2	0	8.74	2
gi229471079	213	24.1289	5.66846	nef protein [Human immunodeficiency virus 1]	9.39	2	0	9.39	2
gi56608868	209	23.7216	5.61768	nef protein [Human immunodeficiency virus 1]	9.57	2	0	9.57	2
gi124389666	223	25.4174	5.63037	nef protein [Human immunodeficiency virus 1]	12.56	2	0	5.83	1
gi117075218	208	0	5.43994	nef protein [Human immunodeficiency virus 1]	5.29	2	0	5.29	2
gi94540116	207	23.2983	6.15088	nef protein [Human immunodeficiency virus 1]	7.25	2	0	7.25	2
gi94539456	211	24.0067	5.96045	nef protein [Human immunodeficiency virus 1]	5.69	2	0	5.69	2
gi94539434	209	23.8274	5.80811	nef protein [Human immunodeficiency virus 1]	4.78	2	0	4.78	1
gi94539332	213	24.4544	5.47803	nef protein [Human immunodeficiency virus 1]	10.33	2	0	10.33	2
gi94539086	206	23.5842	5.22412	nef protein [Human immunodeficiency virus 1]	8.25	2	0	8.25	1
gi94538566	210	23.8204	5.93506	nef protein [Human immunodeficiency virus 1]	4.76	2	0	4.76	1
gi109894072	211	23.8627	6.60986	nef protein [Human immunodeficiency virus 1]	16.59	2	0	8.53	1
gi260533650	205	23.3016	5.96045	nef protein [Human immunodeficiency virus 1]	14.15	2
gi256012700	207	23.4906	5.96045	nef protein [Human immunodeficiency virus 1]	14.49	2
gi256011916	206	23.5375	5.30029	nef protein [Human immunodeficiency virus 1]	14.08	2
gi255964751	92	10.1191	9.14404	nef protein [Human immunodeficiency virus 1]	18.48	2
gi44194549	211	23.745	6.63916	nef protein [Human immunodeficiency virus 1]	13.27	2
gi17046730	100	11.0115	6.7124	nef protein [Human immunodeficiency virus 1]	7	3
gi4868223	209	23.8925	5.32568	nef protein [Human immunodeficiency virus 1]	17.7	2
gi157273990	204	23.1093	6.06201	nef protein [Human immunodeficiency virus 1]	5.88	2
gi94539016	207	23.5242	5.61768	nef protein [Human immunodeficiency virus 1]	18.84	2
gi94538868	210	23.8276	6.16357	nef protein [Human immunodeficiency virus 1]	20.95	2
gi21425711	246	28.0752	8.00146	nef protein [Human immunodeficiency virus 1]	8.54	2
gi256012422	206	23.4725	5.77002	nef protein [Human immunodeficiency virus 1]	7.77	2
gi256011848	210	24.1307	5.60498	nef protein [Human immunodeficiency virus 1]	24.76	4
gi52421740	207	23.7336	5.80811	nef protein [Human immunodeficiency virus 1]	7.73	2
gi52421740	207	23.7336	5.80811	nef protein [Human immunodeficiency virus 1]	7.73	2
gi52421740	207	23.7336	5.80811	nef protein [Human immunodeficiency virus 1]	7.73	2
gi94539786	207	23.4227	6.15088	nef protein [Human immunodeficiency virus 1]	19.81	2
gi94539494	207	23.5797	5.78271	nef protein [Human immunodeficiency virus 1]	7.73	2
gi94539384	201	23.2261	6.52197	nef protein [Human immunodeficiency virus 1]	18.41	2
gi94539250	204	23.2196	5.96045	nef protein [Human immunodeficiency virus 1]	14.71	2
gi94539088	206	23.4929	6.15088	nef protein [Human immunodeficiency virus 1]	17.48	2
gi94540337	209	23.7863	5.93506	nef protein [Human immunodeficiency virus 1]	12.92	2
gi71060450	206	23.7477	6.27783	negative factor [Human immunodeficiency virus 1]	4.85	2	3.73032	4.85	2
gi28172699	219	24.3702	6.11279	p24 [Human immunodeficiency virus 1]	9.13	3	1.67341	9.13	2
gi11125602	207	23.0866	5.63037	p24 protein [Human immunodeficiency virus 1]	10.14	2
gi6624678	207	23.1037	5.87158	p24 protein [Human immunodeficiency virus 1]	13.04	2
gi9929177	165	18.0295	10.1987	p24 protein [Human immunodeficiency virus 1]	24.24	2
gi9931090	492	54.7178	9.11475	p55 myristylated protein [Human immunodeficiency virus 1]	5.89	2	0	5.89	2
gi14160854	1004	113.362	8.39697	pol [Human immunodeficiency virus 1]	2.49	2
gi119507989	1003	113.399	8.14795	Pol [Human immunodeficiency virus 1]	3.59	2
gi18389684	999	113.538	8.32373	Pol polyprotein [Human immunodeficiency virus 1]	5.81	4	0	3.6	3
gi8885968	1030	116.479	8.1333	pol polyprotein [Human immunodeficiency virus 1]	1.75	2	0	1.75	1
gi21685928	317	35.834	8.76318	pol polyprotein [Human immunodeficiency virus 1]	4.1	2
gi33383383	434	49.222	8.70459	pol polyprotein [Human immunodeficiency virus 1]	3.23	2
gi183197180	404	45.8354	8.41162	pol protein [Human immunodeficiency virus 1]	3.47	3	5.26923	3.47	3
gi22596432	1003	113.438	8.06006	pol protein [Human immunodeficiency virus 1]	2.09	2	4.57106	2.09	2
gi148924017	332	37.701	9.05615	pol protein [Human immunodeficiency virus 1]	6.02	2	4.17864	6.02	2
gi116276819	499	57.3843	8.86572	pol protein [Human immunodeficiency virus 1]	2.61	2	3.84037	2.61	2
gi116275983	96	10.5276	8.86572	pol protein [Human immunodeficiency virus 1]	28.13	2	3.83984	28.13	2
gi256267697	381	42.8964	8.38232	pol protein [Human immunodeficiency virus 1]	2.62	2	3.76306	2.62	2
gi126467148	434	49.4823	8.45557	pol protein [Human immunodeficiency virus 1]	2.76	2	3.67747	2.76	2
gi9938189	328	37.3808	8.99756	pol protein [Human immunodeficiency virus 1]	8.23	2	3.62889	8.23	2
gi256576727	382	43.0676	8.82178	pol protein [Human immunodeficiency virus 1]	3.66	2	3.62031	3.66	2
gi288187739	668	75.9051	8.39697	pol protein [Human immunodeficiency virus 1]	3.14	2	3.61627	3.14	2
gi222146596	434	49.155	8.73389	pol protein [Human immunodeficiency virus 1]	2.53	3	3.61141	2.53	2
gi119657053	434	49.4912	8.60205	pol protein [Human immunodeficiency virus 1]	2.76	2	3.56654	2.76	2
gi87137869	434	49.5341	8.5874	pol protein [Human immunodeficiency virus 1]	2.53	2	3.52399	2.53	2
gi259381184	305	35.0653	9.02686	pol protein [Human immunodeficiency virus 1]	4.59	2	3.3134	4.59	2
gi256011318	1009	114.192	8.27979	pol protein [Human immunodeficiency virus 1]	2.38	2	2.88049	1.39	1
gi256011256	1006	113.84	8.06006	pol protein [Human immunodeficiency virus 1]	1.19	2	2.59348	1.19	2
gi256011062	1003	0	8.33838	pol protein [Human immunodeficiency virus 1]	1.99	2	2.50574	1.99	2
gi256011674	1002	113.427	8.22119	pol protein [Human immunodeficiency virus 1]	2.3	2	2.17971	2.3	2
gi119657009	434	49.3174	8.73389	pol protein [Human immunodeficiency virus 1]	8.99	2	2.17294	8.99	2
gi164431076	346	39.5469	9.05615	pol protein [Human immunodeficiency virus 1]	4.34	2	2.13714	4.34	2
gi259381620	353	40.2392	9.0708	pol protein [Human immunodeficiency virus 1]	2.83	2	1.97424	2.83	2
gi27452667	423	48.1855	8.68994	pol protein [Human immunodeficiency virus 1]	5.44	3	1.96895	5.44	3
gi226995395	240	28.0296	8.96826	pol protein [Human immunodeficiency virus 1]	7.5	2	1.96714	7.5	2
gi21952107	321	36.3013	9.02686	pol protein [Human immunodeficiency virus 1]	7.48	2	1.8659	3.12	1
gi14530255	1003	114.344	8.104	pol protein [Human immunodeficiency virus 1]	3.69	2	1.84749	1.3	1
gi16118341	1012	114.638	8.60205	pol protein [Human immunodeficiency virus 1]	3.16	2	1.7584	3.16	2
gi16945947	146	15.3201	5.23682	pol protein [Human immunodeficiency virus 1]	8.9	2	1.74985	8.9	2
gi256011090	1006	113.783	8.104	pol protein [Human immunodeficiency virus 1]	1.09	2	1.69855	1.09	2
gi33517780	197	22.9449	8.86572	pol protein [Human immunodeficiency virus 1]	6.6	2	1.6662	6.6	2
gi170522290	499	56.7137	8.77783	pol protein [Human immunodeficiency virus 1]	4.01	3	1.63774	4.01	2
gi183201840	404	46.0668	8.54346	pol protein [Human immunodeficiency virus 1]	2.48	3	1.62668	2.48	2
gi183191810	404	46.1011	8.79248	pol protein [Human immunodeficiency virus 1]	2.48	3	1.62668	2.48	2
gi13604702	371	42.186	8.86572	pol protein [Human immunodeficiency virus 1]	5.39	2	1.62081	5.39	2
gi263201022	1002	113.47	8.29443	pol protein [Human immunodeficiency virus 1]	3.19	2	0	3.19	2
gi263201004	1002	113.249	8.39697	pol protein [Human immunodeficiency virus 1]	2.79	4	0	1.4	2
gi257786161	499	57.0102	8.93896	pol protein [Human immunodeficiency virus 1]	4.01	2	0	4.01	2
gi239616194	418	47.5672	8.90967	pol protein [Human immunodeficiency virus 1]	6.46	2	0	6.46	2
gi60267993	423	47.9644	8.80713	pol protein [Human immunodeficiency virus 1]	2.6	2	0	2.6	2
gi57429173	499	57.1335	8.92432	pol protein [Human immunodeficiency virus 1]	10.42	2	0	6.01	1
gi57429059	499	56.9857	8.83643	pol protein [Human immunodeficiency virus 1]	5.61	4	0	5.61	4
gi272938940	524	60.2008	8.99756	pol protein [Human immunodeficiency virus 1]	8.02	3	0	8.02	3
gi13605071	328	36.8716	9.02686	pol protein [Human immunodeficiency virus 1]	12.8	2	0	7.01	1
gi11385931	175	20.3018	9.70068	pol protein [Human immunodeficiency virus 1]	5.71	2	0	5.71	2
gi9942943	328	37.3228	9.11475	pol protein [Human immunodeficiency virus 1]	6.71	3	0	6.71	1
gi42717440	499	57.0076	9.05615	pol protein [Human immunodeficiency virus 1]	6.41	2	0	6.41	2
gi226348686	725	82.9311	7.91357	pol protein [Human immunodeficiency virus 1]	2.21	2	0	2.21	2
gi194274041	299	33.2901	8.00146	pol protein [Human immunodeficiency virus 1]	6.35	2	0	6.35	2
gi29422015	396	45.0557	8.89502	pol protein [Human immunodeficiency virus 1]	4.04	2	0	4.04	2
gi199582883	380	43.0115	8.39697	pol protein [Human immunodeficiency virus 1]	2.89	2	0	2.89	2
gi148612264	391	44.4604	9.14404	pol protein [Human immunodeficiency virus 1]	7.93	2	0	6.39	1
gi183203462	404	46.0107	8.95361	pol protein [Human immunodeficiency virus 1]	6.19	2	0	6.19	2
gi183191608	404	46.1656	8.54346	pol protein [Human immunodeficiency virus 1]	3.47	2	0	3.47	1
gi157273983	1005	113.531	8.66064	pol protein [Human immunodeficiency virus 1]	2.69	2	0	2.69	1
gi134252633	676	77.0272	7.41553	pol protein [Human immunodeficiency virus 1]	2.07	2	0	2.07	1
gi119362056	288	32.3035	8.00146	pol protein [Human immunodeficiency virus 1]	6.94	2	0	6.94	2
gi116277069	499	57.0788	8.85107	pol protein [Human immunodeficiency virus 1]	3.61	2	0	3.61	2
gi63014478	1000	113.15	8.1626	pol protein [Human immunodeficiency virus 1]	3.1	2	0	2.5	1
gi263200958	1003	113.464	8.04541	pol protein [Human immunodeficiency virus 1]	3.79	2
gi222146696	434	49.1805	8.42627	pol protein [Human immunodeficiency virus 1]	7.37	2
gi258618347	338	38.4803	8.95361	pol protein [Human immunodeficiency virus 1]	5.03	4
gi256267529	381	43.0625	8.85107	pol protein [Human immunodeficiency virus 1]	8.66	2
gi256011698	1006	113.713	7.94287	pol protein [Human immunodeficiency virus 1]	2.78	2
gi256011264	1005	113.889	8.74854	pol protein [Human immunodeficiency virus 1]	4.48	2
gi256010921	1003	113.601	8.5874	pol protein [Human immunodeficiency virus 1]	3.49	4
gi282598134	1003	114.408	8.41162	pol protein [Human immunodeficiency virus 1]	1.89	2
gi262065356	518	59.7943	7.89893	pol protein [Human immunodeficiency virus 1]	3.47	2
gi208971036	434	49.3188	8.26514	pol protein [Human immunodeficiency virus 1]	11.06	2
gi62240944	423	48.2678	8.52881	pol protein [Human immunodeficiency virus 1]	10.87	2
gi24062048	365	41.0406	9.11475	pol protein [Human immunodeficiency virus 1]	12.6	2
gi24062032	364	41.5339	8.89502	pol protein [Human immunodeficiency virus 1]	9.07	2
gi16903794	330	37.558	9.36377	pol protein [Human immunodeficiency virus 1]	13.64	2
gi13604778	381	42.8725	8.88037	pol protein [Human immunodeficiency virus 1]	14.44	3
gi55846129	401	45.797	8.48486	pol protein [Human immunodeficiency virus 1]	10.72	2
gi51342787	231	27.225	8.04541	pol protein [Human immunodeficiency virus 1]	9.96	2
v	408	46.5674	8.55811	pol protein [Human immunodeficiency virus 1]	4.66	2
gi37682411	1006	113.802	8.47021	pol protein [Human immunodeficiency virus 1]	1.89	2
gi37105807	423	47.721	9.0415	pol protein [Human immunodeficiency virus 1]	11.82	2
gi6643027	912	103.742	8.41162	pol protein [Human immunodeficiency virus 1]	4.06	3
gi212383188	1004	113.484	8.1333	pol protein [Human immunodeficiency virus 1]	3.69	2
gi212382772	999	113.195	8.04541	pol protein [Human immunodeficiency virus 1]	5.41	4
gi183191808	404	0	8.83643	pol protein [Human immunodeficiency virus 1]	4.21	4
gi183189828	404	46.3132	8.85107	pol protein [Human immunodeficiency virus 1]	7.18	2
gi169930507	434	49.6132	8.03076	pol protein [Human immunodeficiency virus 1]	4.61	2
gi118640046	77	8.18647	5.97314	pol protein [Human immunodeficiency virus 1]	29.87	2
gi124299411	165	18.2363	8.49951	pol protein [Human immunodeficiency virus 1]	13.33	2
gi116278876	499	57.2934	8.82178	pol protein [Human immunodeficiency virus 1]	4.41	2
gi116278876	499	57.2934	8.82178	pol protein [Human immunodeficiency virus 1]	4.41	2
gi116277614	499	57.3357	8.70459	pol protein [Human immunodeficiency virus 1]	6.61	3
gi116277516	499	0	8.25049	pol protein [Human immunodeficiency virus 1]	8.02	2
gi116275305	96	10.3763	6.50732	pol protein [Human immunodeficiency virus 1]	29.17	2
gi60651839	1003	113.576	8.82178	pol protein [Human immunodeficiency virus 1]	1.79	2
gi262288111	499	56.9411	9.11475	pol protein [Human immunodeficiency virus 1]	7.82	3
gi256011590	1006	0	8.54346	pol protein [Human immunodeficiency virus 1]	1.69	2
gi256010933	965	0	7.48877	pol protein [Human immunodeficiency virus 1]	5.18	3
gi254546857	434	49.3356	8.51416	pol protein [Human immunodeficiency virus 1]	9.45	2
gi67866559	1014	114.75	7.69385	pol protein [Human immunodeficiency virus 1]	5.62	2
gi18699112	420	47.681	9.26123	pol protein [Human immunodeficiency virus 1]	3.1	2
gi17046849	1002	113.435	8.44092	pol protein [Human immunodeficiency virus 1]	4.89	2
gi13604624	380	43.0945	9.14404	pol protein [Human immunodeficiency virus 1]	5.53	2
gi38231418	434	49.118	8.70459	pol protein [Human immunodeficiency virus 1]	6.22	2
gi226533966	307	34.2286	8.20654	pol protein [Human immunodeficiency virus 1]	5.86	2
gi160700279	537	60.5387	8.85107	pol protein [Human immunodeficiency virus 1]	4.1	2
gi183202916	404	0	8.41162	pol protein [Human immunodeficiency virus 1]	4.21	2
gi116274015	96	10.3954	7.98682	pol protein [Human immunodeficiency virus 1]	22.92	2
gi8247235	562	64.412	8.92432	pol protein [Human immunodeficiency virus 1]	3.74	4
gi23344577	99	10.6205	9.40771	protease [Human immunodeficiency virus 1]	12.12	5	4.35979	12.12	2
gi55702788	99	10.6335	8.00146	protease [Human immunodeficiency virus 1]	12.12	2	3.67747	12.12	2
gi134143850	45	0	8.20654	protease [Human immunodeficiency virus 1]	46.67	1	2.41502	46.67	1
gi2588478	99	10.7378	8.54346	protease [Human immunodeficiency virus 1]	46.46	2	2.09606	16.16	1
gi63097535	229	26.4137	9.0415	protease [Human immunodeficiency virus 1]	5.68	2	1.89458	5.68	2
gi51872371	98	10.9565	8.45557	protease [Human immunodeficiency virus 1]	12.24	2	1.86889	12.24	2
gi134143874	73	7.77761	7.12256	protease [Human immunodeficiency virus 1]	16.44	2	1.78517	16.44	2
gi63096627	211	24.5275	8.79248	protease [Human immunodeficiency virus 1]	7.11	3	1.77423	7.11	2
gi256705277	99	10.8148	8.51416	protease [Human immunodeficiency virus 1]	14.14	2	0	14.14	2
gi24021342	95	10.2516	8.49951	protease [Human immunodeficiency virus 1]	14.74	2	0	14.74	2
gi134143870	94	10.1123	8.32373	protease [Human immunodeficiency virus 1]	28.72	2	0	28.72	1
gi157281181	167	18.1199	9.62744	protease [Human immunodeficiency virus 1]	23.35	2
gi65336599	83	9.05882	9.12939	protease [Human immunodeficiency virus 1]	28.92	2
gi31280994	99	10.9421	8.1333	protease [Human immunodeficiency virus 1]	12.12	2
gi38425168	86	9.32068	9.29053	protease [Human immunodeficiency virus 1]	55.81	2
gi134143366	93	10.0212	8.49951	protease [Human immunodeficiency virus 1]	52.69	2
gi157281027	170	18.3668	7.92822	protease [Human immunodeficiency virus 1]	18.82	2
gi55703548	99	10.8038	8.49951	protease [Human immunodeficiency virus 1]	14.14	2
gi109727452	130	14.3027	9.86182	protease [Human immunodeficiency virus 1]	20	2
gi62467696	121	13.1247	8.55811	rev protein [Human immunodeficiency virus 1]	14.88	2	3.8305	14.88	2
gi32189804	118	13.2309	10.1108	rev protein [Human immunodeficiency virus 1]	11.86	1	2.99219	11.86	1
gi158967383	116	12.7946	9.84717	rev protein [Human immunodeficiency virus 1]	15.52	2	0	15.52	1
gi74100776	116	12.9676	8.01611	rev protein [Human immunodeficiency virus 1]	25.86	2
gi212674663	116	13.0798	9.83252	rev protein [Human immunodeficiency virus 1]	22.41	2
gi67082579	191	22.2545	9.39307	reverse transcriptase [Human immunodeficiency virus 1]	10.47	2	4.42949	10.47	2
gi55708594	368	42.7033	9.0415	reverse transcriptase [Human immunodeficiency virus 1]	3.53	2	3.84037	3.53	2
gi220979252	228	26.6949	9.05615	reverse transcriptase [Human immunodeficiency virus 1]	5.7	2	3.74541	5.7	2
gi67034264	174	20.1045	9.34912	reverse transcriptase [Human immunodeficiency virus 1]	6.32	2	3.39258	6.32	2
gi119351904	244	28.5968	8.67529	reverse transcriptase [Human immunodeficiency virus 1]	10.25	2	2.59256	10.25	1
gi125746556	212	24.7559	9.02686	reverse transcriptase [Human immunodeficiency virus 1]	7.55	2	2.3581	7.55	2
gi111379165	270	31.5815	8.80713	reverse transcriptase [Human immunodeficiency virus 1]	5.56	2	2.27303	5.56	2
gi73624682	210	24.5456	8.32373	reverse transcriptase [Human immunodeficiency virus 1]	8.57	2	1.74613	8.57	2
gi134146138	209	24.7107	9.20264	reverse transcriptase [Human immunodeficiency virus 1]	12.92	3	1.70904	12.92	3
gi238560347	254	29.4531	7.51807	reverse transcriptase [Human immunodeficiency virus 1]	5.12	2	1.66566	5.12	2
gi30350474	255	29.5693	7.92822	reverse transcriptase [Human immunodeficiency virus 1]	5.1	2	1.66566	5.1	2
gi1470188	244	28.3678	9.08545	reverse transcriptase [Human immunodeficiency virus 1]	4.92	2	1.65396	4.92	2
gi255984688	160	18.1603	5.33838	reverse transcriptase [Human immunodeficiency virus 1]	8.13	2	1.6125	8.13	2
gi238560590	254	29.4712	8.86572	reverse transcriptase [Human immunodeficiency virus 1]	5.12	2	1.60578	5.12	2
gi156628512	305	35.1854	8.86572	reverse transcriptase [Human immunodeficiency virus 1]	4.26	2	1.60287	4.26	2
gi284813638	293	33.9421	9.40771	reverse transcriptase [Human immunodeficiency virus 1]	13.99	4	0	4.78	2
gi256699338	368	42.6464	9.05615	reverse transcriptase [Human immunodeficiency virus 1]	2.72	2	0	2.72	2
gi256696223	210	24.6165	8.80713	reverse transcriptase [Human immunodeficiency virus 1]	22.38	2	0	9.05	1
gi134145352	178	20.9447	9.33447	reverse transcriptase [Human immunodeficiency virus 1]	24.16	2	0	11.24	1
gi108949892	297	34.4702	9.24658	reverse transcriptase [Human immunodeficiency virus 1]	4.38	2	0	4.38	2
gi67081379	191	22.0767	9.64209	reverse transcriptase [Human immunodeficiency virus 1]	25.13	2	0	25.13	2
gi273463704	250	28.8829	7.04932	reverse transcriptase [Human immunodeficiency virus 1]	12.8	2
gi49574381	560	64.3238	8.48486	reverse transcriptase [Human immunodeficiency virus 1]	7.14	2
gi49574218	560	64.2779	8.60205	reverse transcriptase [Human immunodeficiency virus 1]	3.39	2
gi67081921	191	22.3522	9.45166	reverse transcriptase [Human immunodeficiency virus 1]	12.57	2
gi4520775	35	4.16019	9.61279	reverse transcriptase [Human immunodeficiency virus 1]	62.86	2
gi134146019	194	22.93	9.17334	reverse transcriptase [Human immunodeficiency virus 1]	10.82	2
gi195409373	101	11.4034	9.05615	tat protein [Human immunodeficiency virus 1]	13.86	2	3.41772	13.86	2
gi118724128	101	11.7458	9.27588	tat protein [Human immunodeficiency virus 1]	16.83	2	1.92713	16.83	2
gi190179830	29	3.19656	5.10986	tat protein [Human immunodeficiency virus 1]	62.07	2	1.82555	62.07	2
gi25167024	86	9.79269	8.98291	tat protein [Human immunodeficiency virus 1]	30.23	3	1.74146	30.23	3
gi187759131	29	3.12449	4.81787	tat protein [Human immunodeficiency virus 1]	58.62	2	1.60015	58.62	2
gi7416440	71	8.27314	9.93506	Tat protein [Human immunodeficiency virus 1]	14.08	2
gi87245421	101	11.5166	9.12939	tat protein [Human immunodeficiency virus 1]	13.86	2
gi47118210	500	55.7002	8.95361	truncated gag protein [Human immunodeficiency virus 1]	4.8	2
gi183200570	342	38.6576	9.21729	truncated pol protein [Human immunodeficiency virus 1]	3.51	2	3.67747	3.51	2
gi183201440	342	0	9.11475	truncated pol protein [Human immunodeficiency virus 1]	3.8	1	3.0015	3.8	1
gi183196170	342	38.9338	9.20264	truncated pol protein [Human immunodeficiency virus 1]	12.28	2	0	6.14	1
gi183193684	342	38.95	9.39307	truncated pol protein [Human immunodeficiency virus 1]	14.91	2	0	8.77	1
gi256011442	950	107.466	8.00146	truncated pol protein [Human immunodeficiency virus 1]	4.11	2
gi13605038	292	32.6309	9.1001	truncated pol protein [Human immunodeficiency virus 1]	7.19	2
gi183197508	358	40.6615	9.42236	truncated pol protein [Human immunodeficiency virus 1]	4.47	8
gi183198398	342	38.7942	9.12939	truncated pol protein [Human immunodeficiency virus 1]	4.68	2
gi183196548	342	0	8.42627	truncated pol protein [Human immunodeficiency virus 1]	3.51	2
gi3287077	192	22.7498	9.89111	vif [Human immunodeficiency virus 1]	4.69	2	1.80787	4.69	2
gi38491705	192	22.7298	10.0669	vif protein [Human immunodeficiency virus 1]	13.54	5	8.06564	13.54	3
gi38491793	192	22.5476	9.93506	vif protein [Human immunodeficiency virus 1]	13.54	4	5.33807	13.54	3
gi13569290	192	22.5978	9.99365	vif protein [Human immunodeficiency virus 1]	13.54	4	5.33087	13.54	3
gi56193093	192	22.5938	10.1841	vif protein [Human immunodeficiency virus 1]	13.54	3	5.08213	13.54	2
gi70633590	195	23.0009	10.1694	vif protein [Human immunodeficiency virus 1]	13.33	2	5.02109	13.33	2
gi17046534	192	22.6138	10.3013	vif protein [Human immunodeficiency virus 1]	21.35	2	2.35764	21.35	2
gi78172826	192	22.6959	10.3599	vif protein [Human immunodeficiency virus 1]	7.29	5	1.70861	7.29	1
gi190888552	192	22.7028	10.0815	vif protein [Human immunodeficiency virus 1]	4.17	2	1.67313	4.17	2
gi263201033	192	22.6487	9.99365	vif protein [Human immunodeficiency virus 1]	13.02	3	0	6.77	1
gi263201033	192	22.6487	9.99365	vif protein [Human immunodeficiency virus 1]	13.02	3	0	6.77	1
gi263200940	192	22.6398	10.0962	vif protein [Human immunodeficiency virus 1]	13.02	2	0	13.02	2
gi17046824	192	22.5408	10.1401	vif protein [Human immunodeficiency virus 1]	13.02	2	0	13.02	2
gi17046564	192	22.5558	10.1987	vif protein [Human immunodeficiency virus 1]	10.42	2	0	10.42	2
gi16118283	192	22.7588	9.70068	vif protein [Human immunodeficiency virus 1]	8.33	2	0	8.33	2
gi86371859	192	22.8188	9.92041	vif protein [Human immunodeficiency virus 1]	18.23	2
gi8218028	192	22.5317	10.0962	VIF protein [Human immunodeficiency virus 1]	25.52	2
gi57545310	96	11.3108	8.26514	vpr protein [Human immunodeficiency virus 1]	28.13	2
gi263200999	81	9.35397	5.0083	vpu protein [Human immunodeficiency virus 1]	20.99	2	1.66862	20.99	2
gi85700530	90	10.3073	4.84326	vpu protein [Human immunodeficiency virus 1]	32.22	2	0	32.22	1
gi17046698	80	9.24597	5.0083	vpu protein [Human immunodeficiency virus 1]	58.75	2
gi93210641	86	9.70822	4.97021	vpu protein [Human immunodeficiency virus 1]	37.21	2
